# Supplementary material for: Evaluating Turkey-Derived Lactic-Acid-Producing Bacteria as Potential Probiotics for Use in Commercial Turkeys
Source: MDPI journal article supplement (doi:10.3390/app14052010), 2024-02-29
Supplement: s1 [file s1]

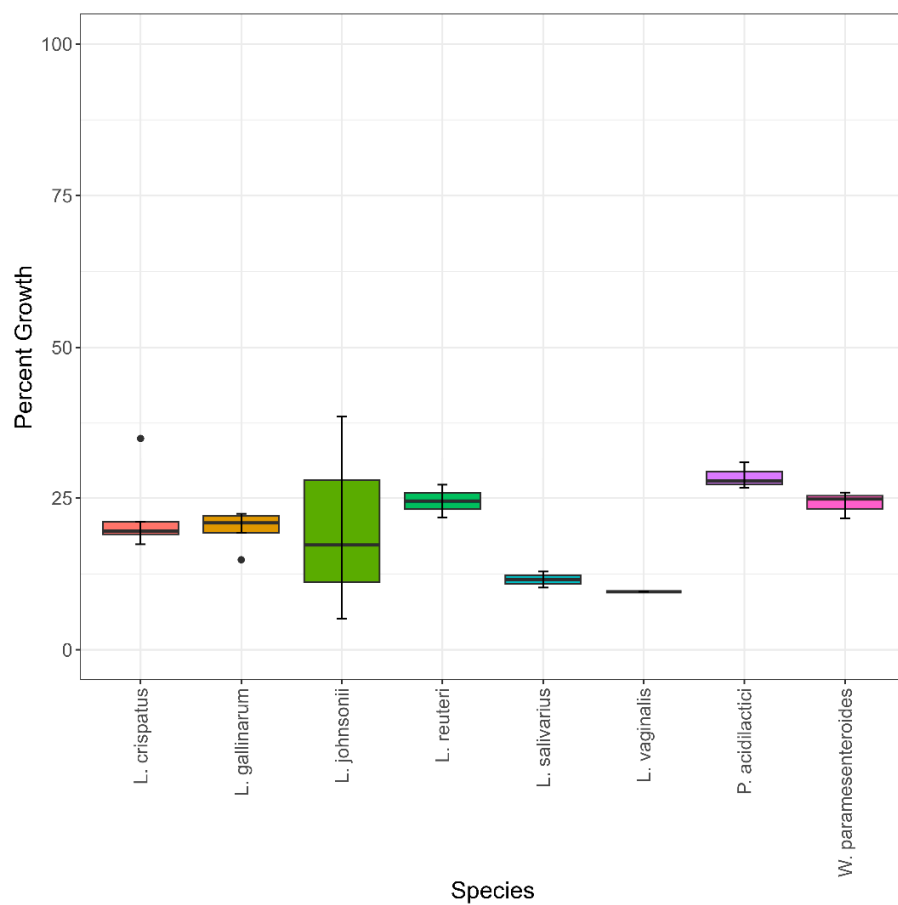

Figure S1. Percent growth in pH 2 using percent area under the curve compared to matched controls by species (n=24). Significance was set at  $P \leq 0.05$ .

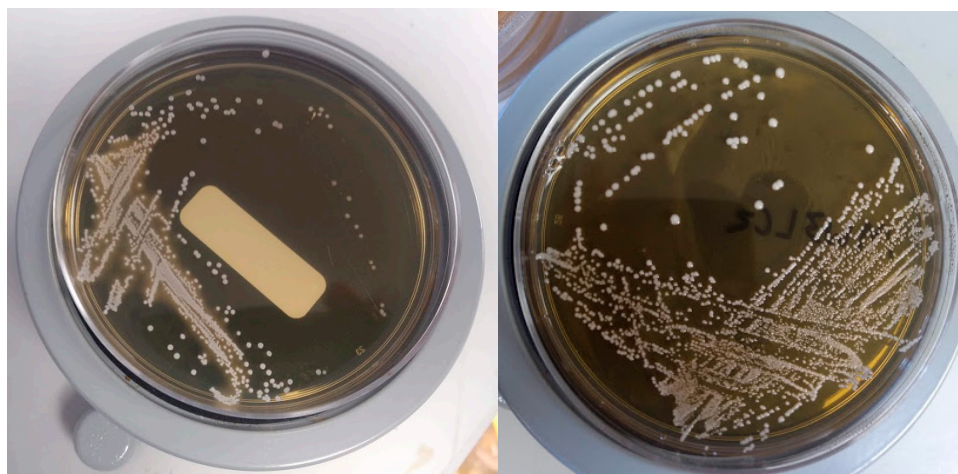

Figure S2. An example of a bile salt hydrolase activity positive *L. johnsonii* isolate with powdery halo (left) and a bile salt hydrolase activity negative *W. paramesenteroides* isolate (right).

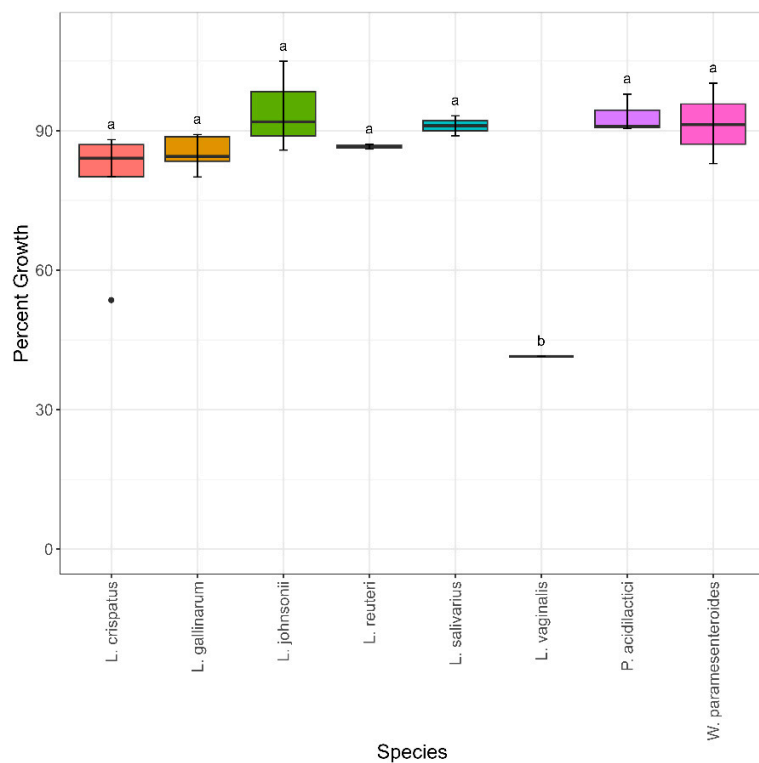

Figure S3. Percent growth using percent area under the curve compared to matched controls by species in 0.03% w/v n=24. Significant differences depicted with distinct letters. Significance was set at  $P \leq 0.05$ .

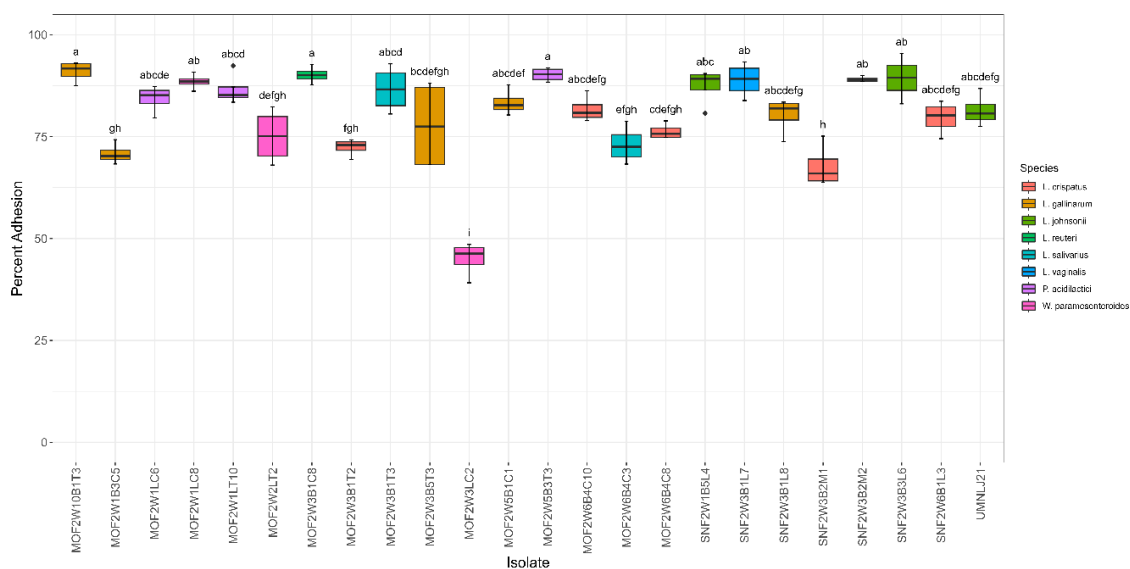

Figure S4. Percent of starting inoculum adhesion to BATC cells by individual isolate. Individual replicates of each isolate depicted. Four replicates of 24 isolates (n=96). Significant differences depicted with distinct letters. Significance was set at  $P \leq 0.05$ .
